# Supplementary material for: Active site specificity profiling datasets of matrix metalloproteinases (MMPs) 1, 2, 3, 7, 8, 9, 12, 13 and 14
Source: PubMed Central journal article supplement (PMC4777984; doi:10.1016/j.dib.2016.02.036), 2016-02-22

# Domain architectures of matrix metalloproteinases.

**Supplementary Figure 1.** (A) Minimal MMPs: MMPs 7 and 26 (matrilysin-1 and -2). (B) Classical MMPs such as MMPs 1, 3, 8, 12, and 13 possessing both catalytic domain (magenta) and hemopexin domain (dark green). (C) The gelatinases, MMPs 2 and 9, with inserted fibronectin-like type-II modules (olive) proximal to the active site. (D) Membrane-type MMPs with a C-terminal transmembrane (e.g. MMPs 14, 15, and 16) or GPI-anchor (MMPs 17 and 25; light gray). Signal- and pro-domains of zymogen forms are depicted in yellow and light green, respectively.

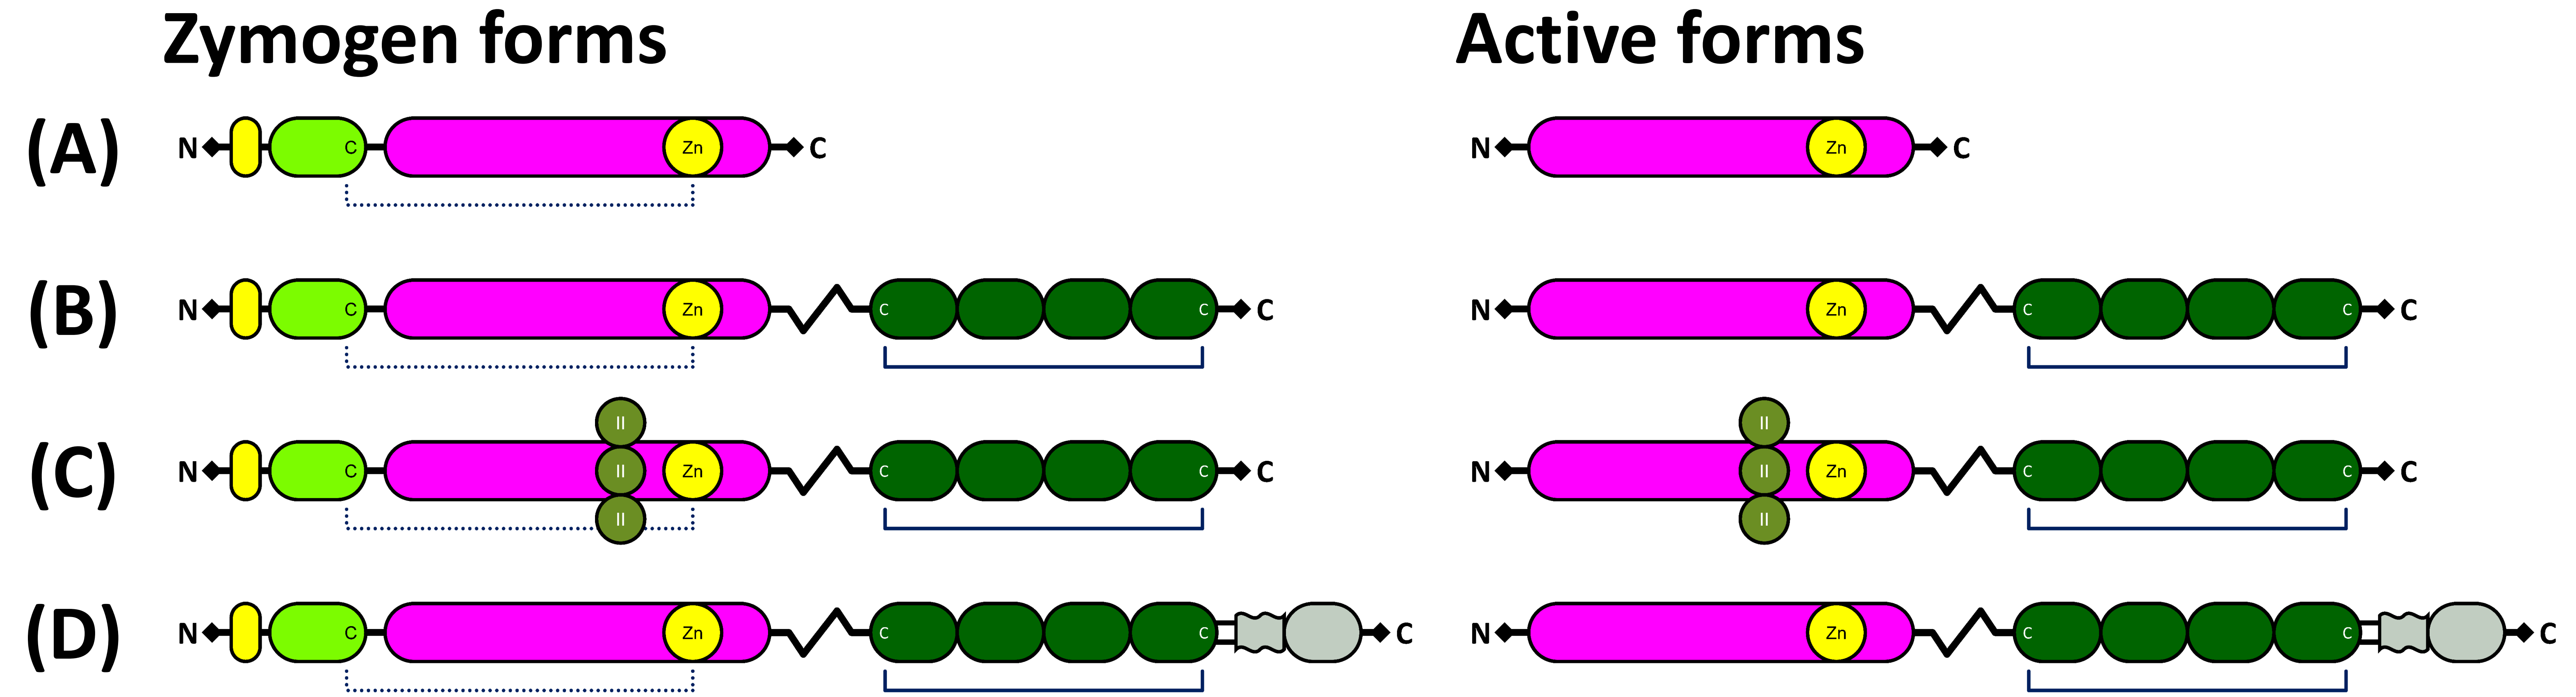

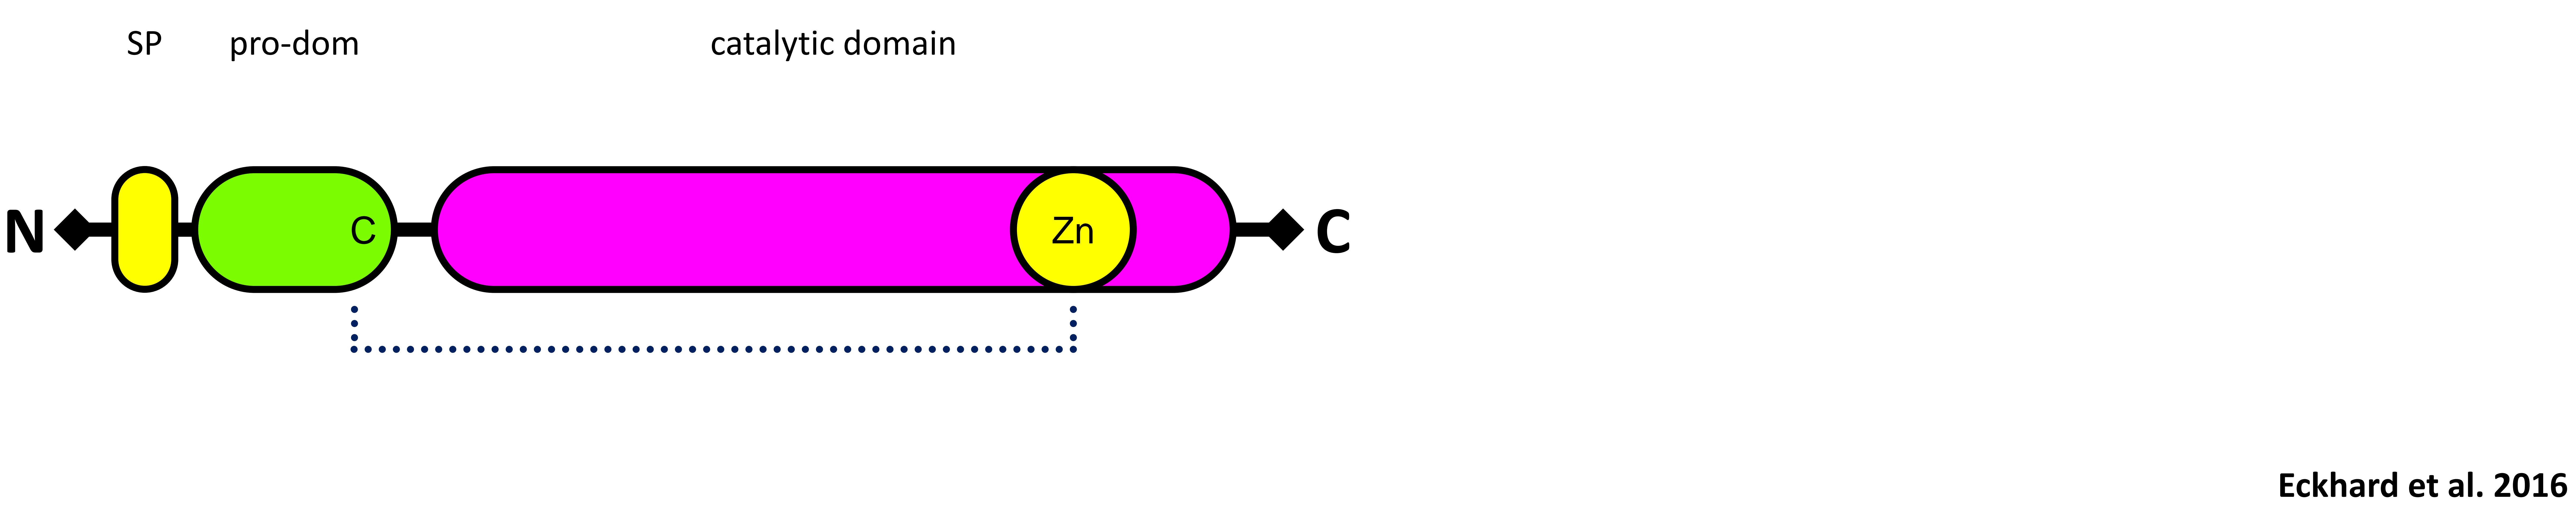

catalytic domain

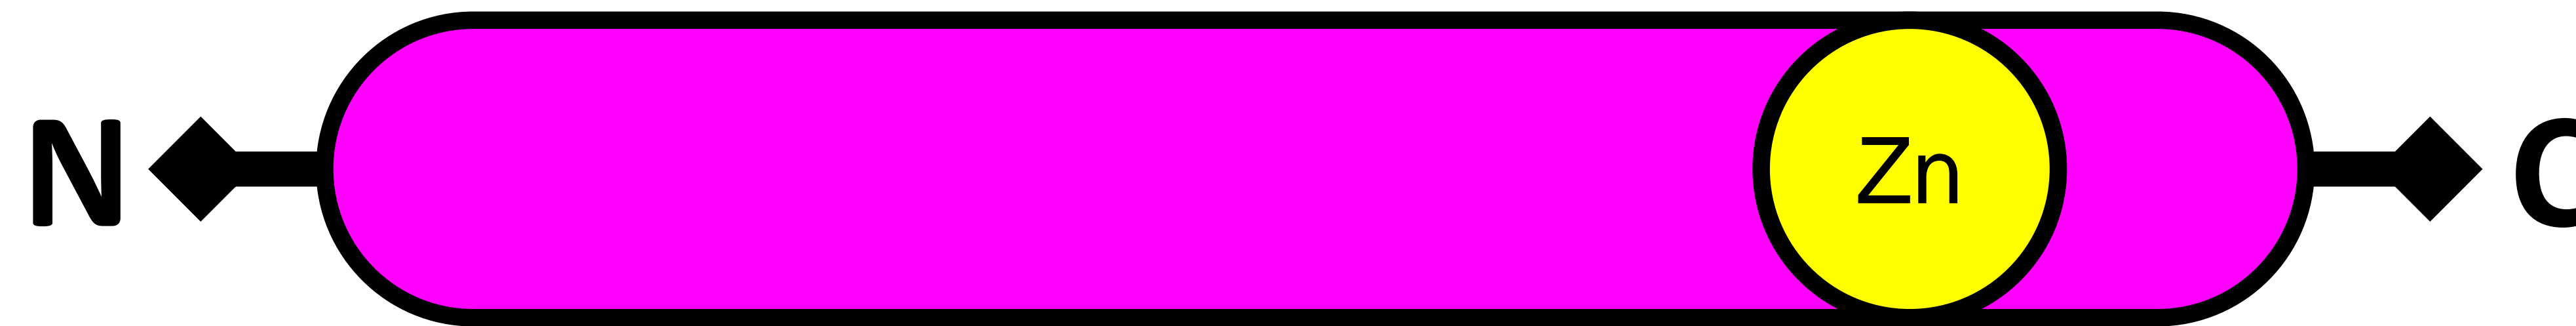

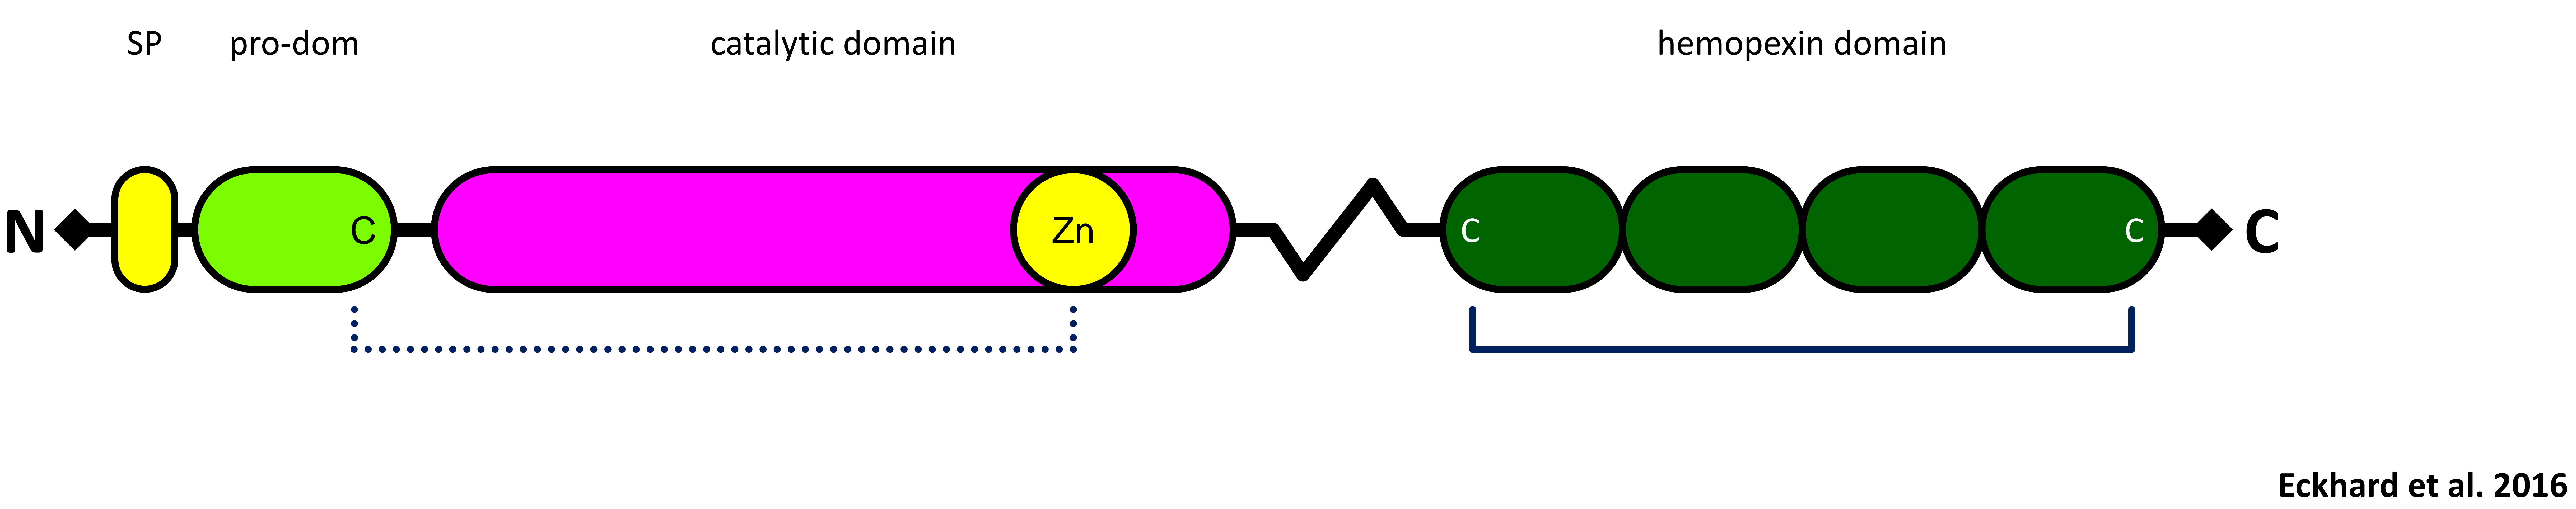

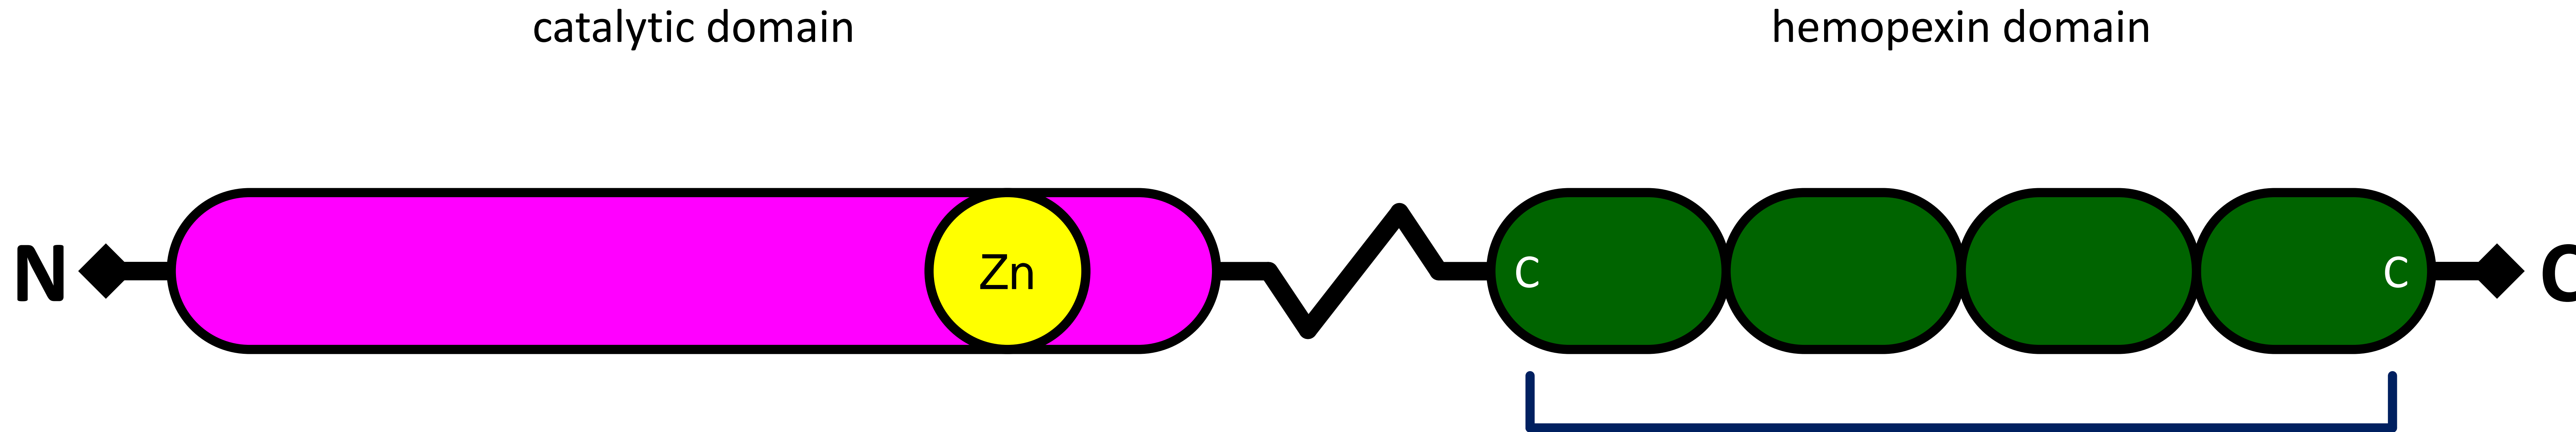

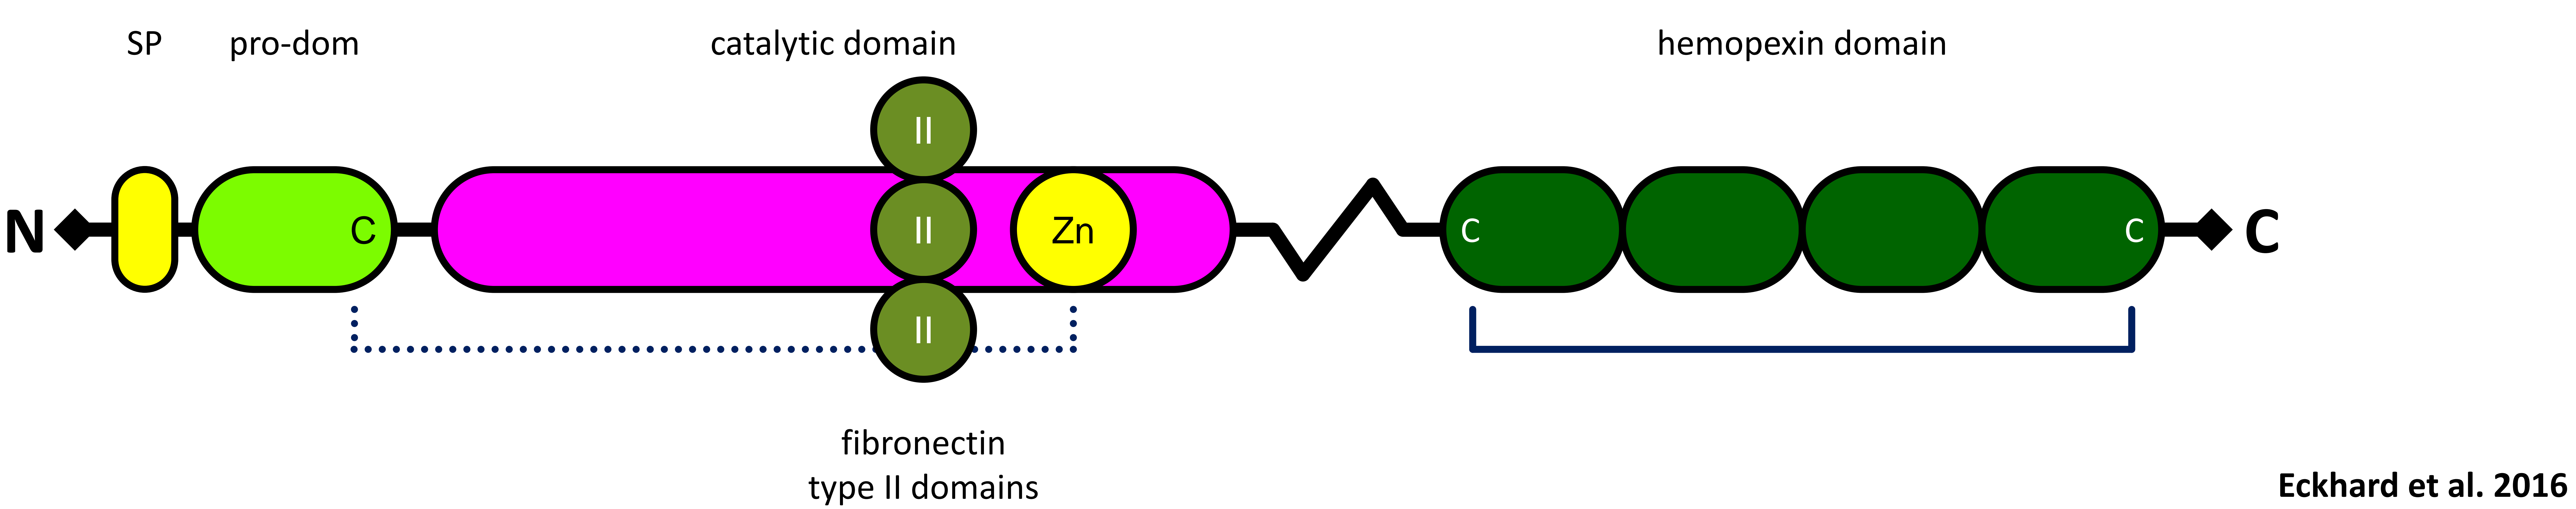

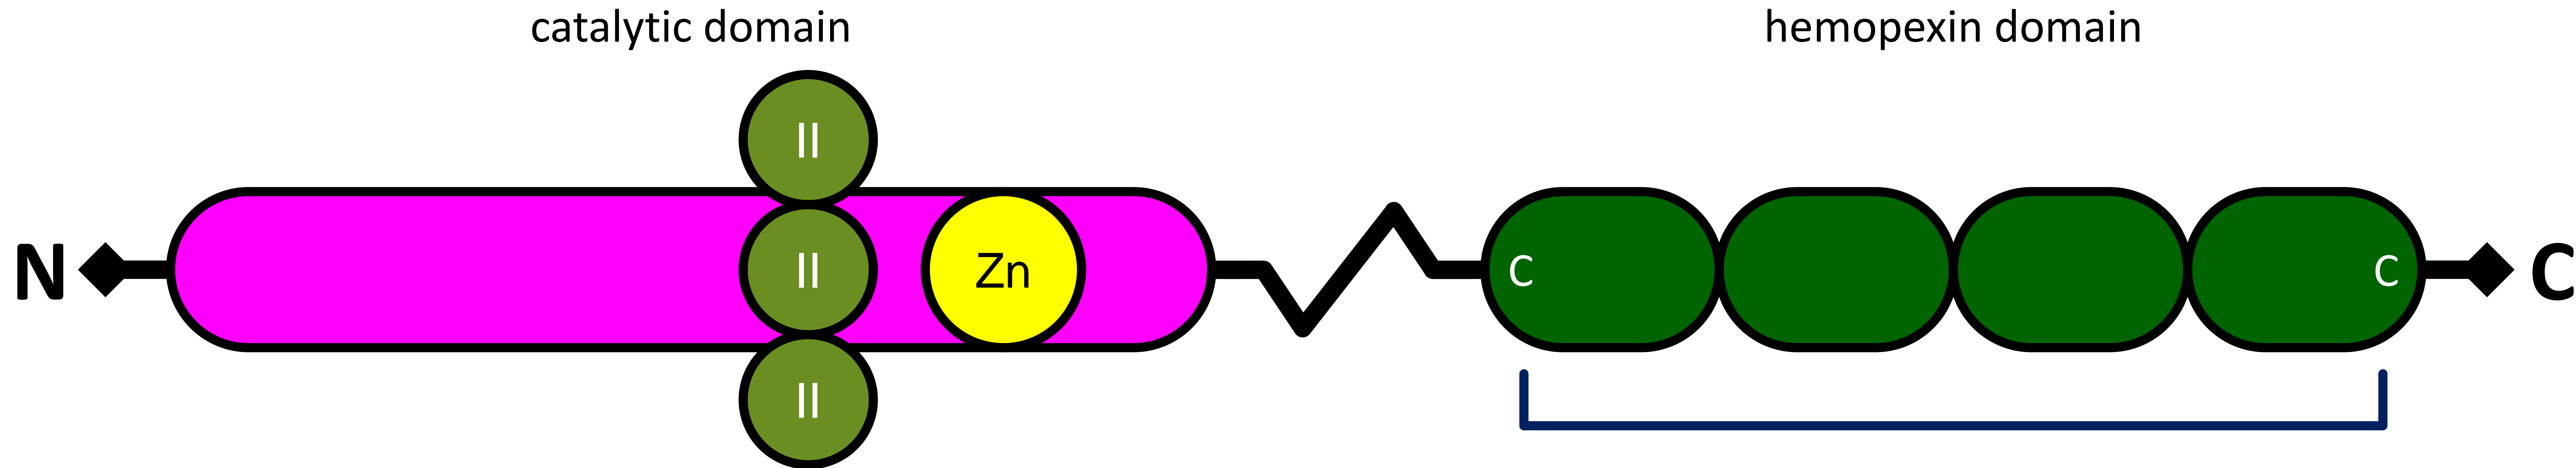

catalytic domain

hemopexin domain

N

Zn

C

C

C

fibronectin  
type II domains

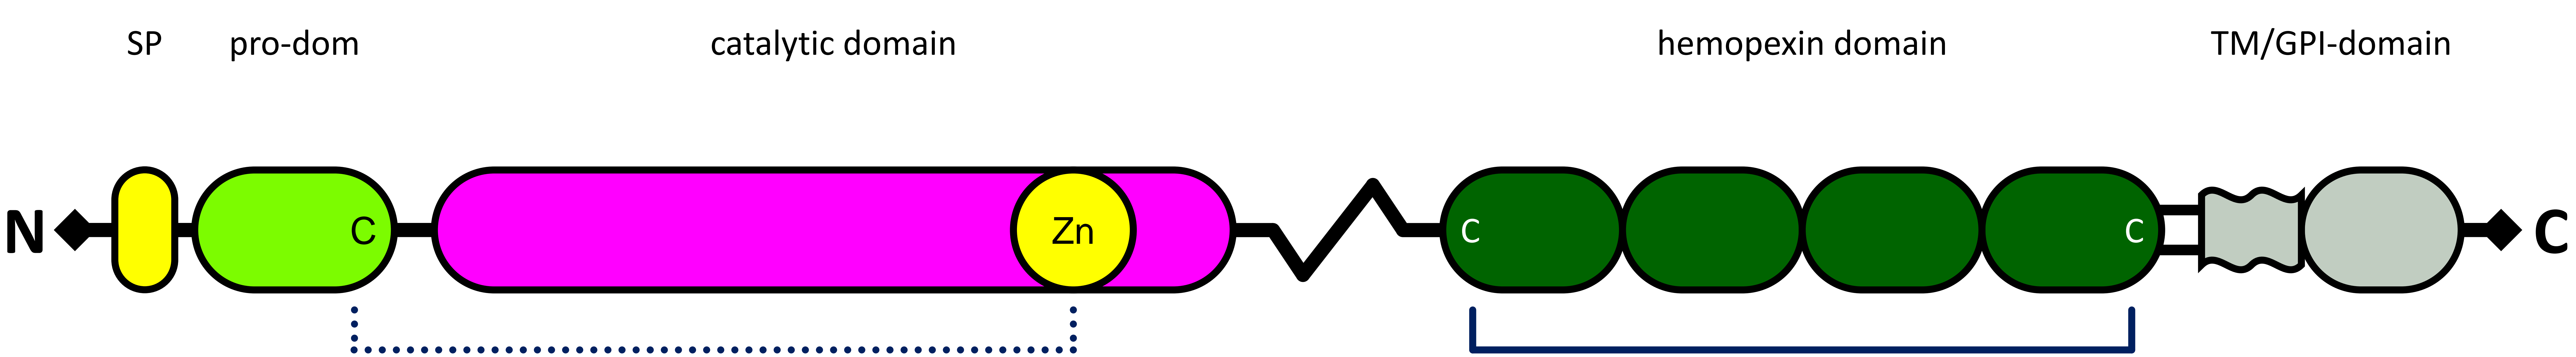



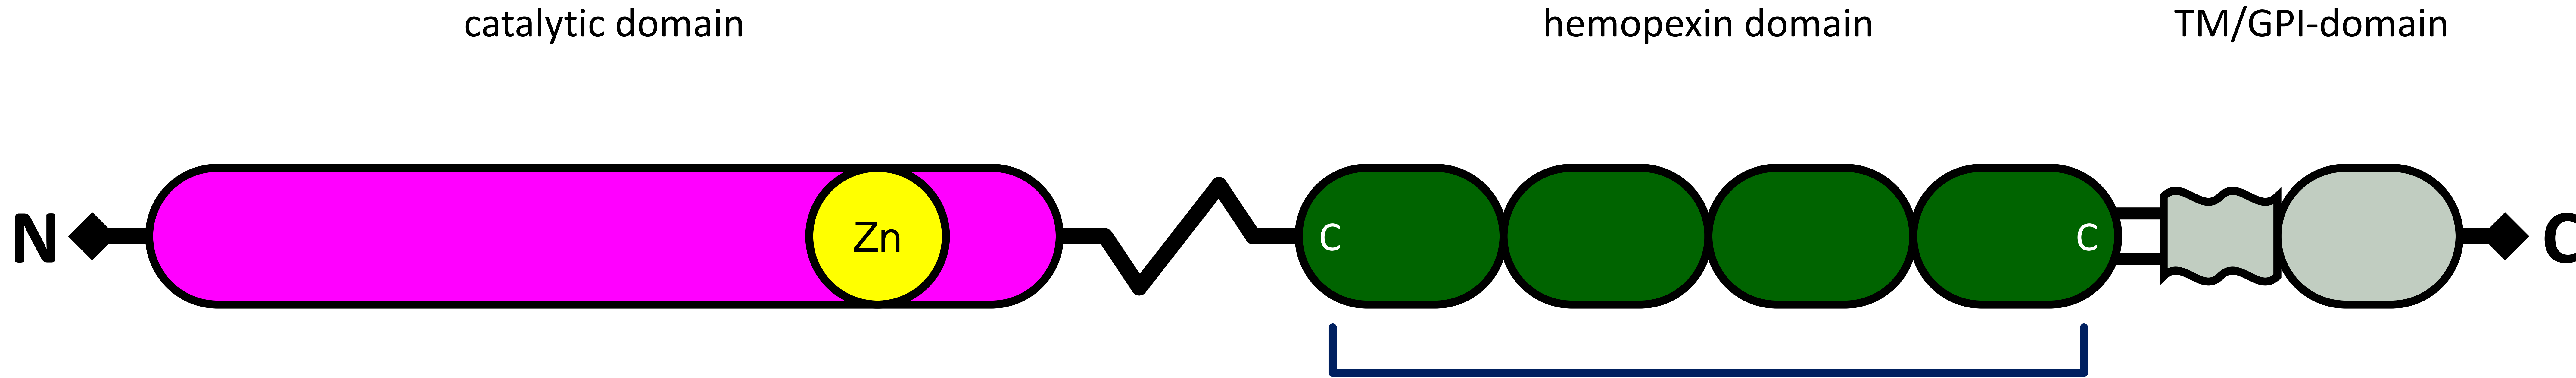

Supplement: mmc1.pdf [file mmc1.pdf]
