# Supplementary material for: Active site specificity profiling datasets of matrix metalloproteinases (MMPs) 1, 2, 3, 7, 8, 9, 12, 13 and 14
Source: PubMed Central journal article supplement (PMC4777984; doi:10.1016/j.dib.2016.02.036), 2016-02-22
Supplement: mmc3.pdf [file mmc3.pdf]

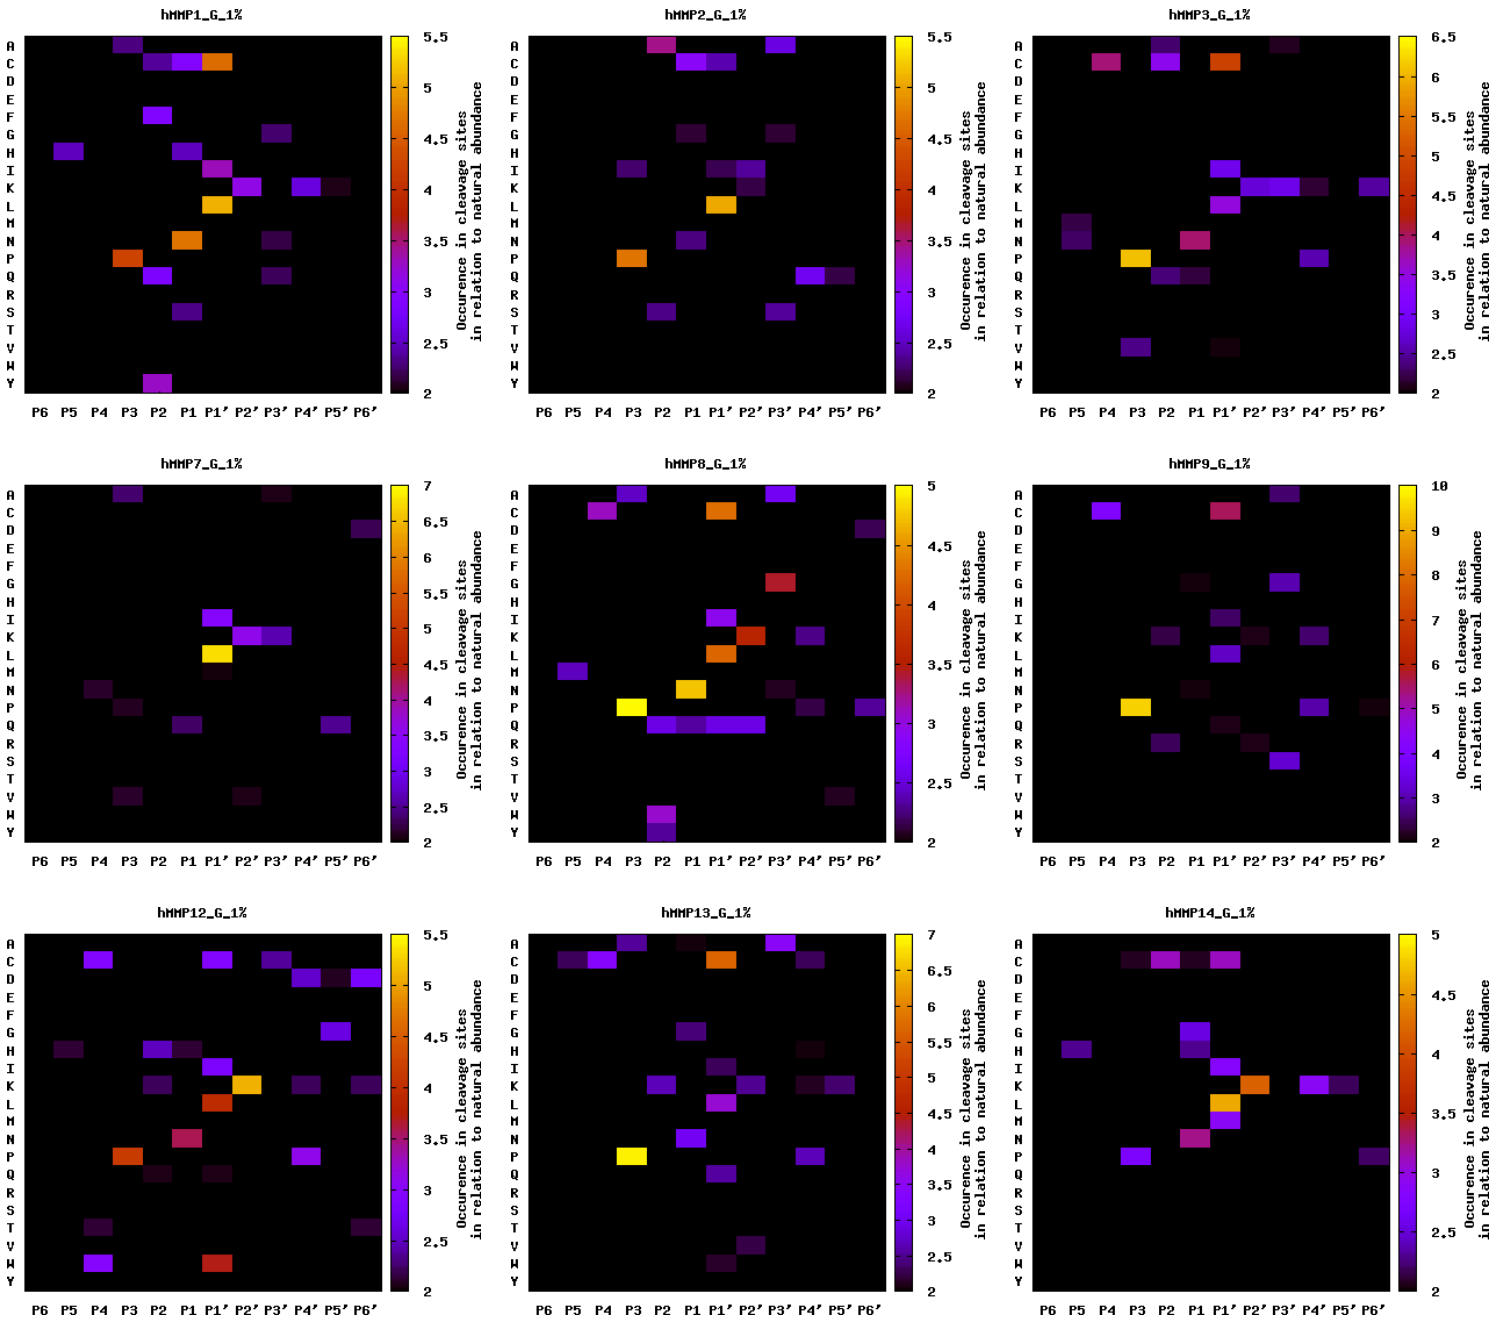

**Supplementary Figure 3.** Specificity profiles of MMPs 1, 2, 3, 7, 8, 9, 12, 13, and 14 using GluC-generated human peptide libraries. Identified cleavage sites are summarized as heat maps showing fold-change over natural abundance. P6 to P6' subsite positions are shown on the x axes with the identified cleavage site between P1 and P1'. Plotted amino acids are indicated on the y axes with single-letter codes. Please refer to Supplementary Figure 3 for corresponding results using GluC-generated peptide libraries.
